# Supplementary material for: Smart intercalation and coordination strategy to construct stable ratiometric fluorescence nanoprobes for the detection of anthrax biomarker
Source: Royal Society of Chemistry journal article supplement (doi:10.1039/d2qi00957a), 2022-01-01
Supplement: d2qi00957a1.pdf [file d2qi00957a1.pdf]

# Supporting information for

## Smart intercalation collaborating coordination strategy to construct stable ratiometric fluorescence nanoprobe for detection of anthrax biomarker

Xiaoxiao Niu, Meixiang Wang, Mengyu Zhang, Rui Cao, Zhaodi Liu\*, Fuying Hao, Liangquan

Sheng and Huajie Xu\*

### Supplementary Figures:

- Fig. S1.** Absorbance at 350 nm and 394 nm of L as a function of Al<sup>3+</sup> concentration.
- Fig. S2.** Job's plots according to the method for continuous variations. The total concentration of L and Al<sup>3+</sup> is 100 μM.
- Fig. S3.** Benesi–Hildebrand plot of L with Al<sup>3+</sup> in ultrapure water.
- Fig. S4.** <sup>1</sup>HNMR titrations of L and L alone with Al<sup>3+</sup> ions in DMSO-*d*<sub>6</sub>.
- Fig. S5.** XRD patterns of Mg-Al-LDHs, Mg-Al-Eu-LDHs and L@Mg-Al-Eu-LDHs.
- Fig. S6.** SEM images of Mg-Al-LDHs.
- Fig. S7.** SEM images of Mg-Al-Eu-LDHs.
- Fig. S8.** SEM images of L@Mg-Al-Eu-LDHs.
- Fig. S9.** N<sub>2</sub> sorption isotherms and pore-size distribution of L@Mg-Al-Tb-LDHs and L@Mg-Al-Eu-LDHs.
- Fig. S10.** TEM images of L@Mg-Al-Eu-LDHs.
- Fig. S11.** HRTEM images of L@Mg-Al-Eu-LDHs.
- Fig. S12.** Elemental mapping images of L@Mg-Al-Eu-LDHs.
- Fig. S13.** XPS spectrum of L@Mg-Al-Tb-LDHs.
- Fig. S14.** XPS spectrum of L@Mg-Al-Eu-LDHs.
- Fig. S15.** Fluorescence spectra of L, Mg-Al-Eu-LDHs and L@Mg-Al-Eu-LDHs.
- Fig. S16.** FTIR spectra of Mg-Al-Tb-LDHs and L@Mg-Al-Tb-LDHs.
- Fig. S17.** FTIR spectra of Mg-Al-Eu-LDHs and L@Mg-Al-Eu-LDHs.
- Fig. S18.** Fluorescence spectra of L@Mg-Al-Eu-LDHs and L@Mg-Al-Eu-LDHs +

DPA.

**Fig. S19.** Time-resolved decay curves of L@Mg-Al-Tb-LDHs and L@Mg-Al-Eu-LDHs before and after the addition of DPA.

**Fig. S20.** Photographs of L@Mg-Al-Eu-LDHs with and without DPA under 254nm UV light.

**Fig. S21.** Plot of fluorescence intensity ratio ( $I_{545}/I_{464}$ ) versus DPA concentration.

**Fig. S22.** Plot of fluorescence intensity ratio ( $I_{615}/I_{464}$ ) versus DPA concentration.

**Fig. S23.** The dependence of the  $I_{545}/I_{464}$  ratio of the L@Mg-Al-Tb-LDHs nanoprobe and the  $I_{615}/I_{464}$  ratio of the L@Mg-Al-Eu-LDHs nanoprobe on pH, respectively.

**Fig. S24.** Fluorescence of L@Mg-Al-Eu-LDHs equipped portable test strips for DPA detection, and plot of G/B (R/B) ratio versus  $C_{DPA}$  ( $\mu\text{M}$ ).

**Fig. S25.** Fluorescence spectra of L@Mg-Al-Eu-LDHs on different volumes of *B. subtilis* spores, and the plot of fluorescence intensity at  $I_{615}/I_{464}$  against the concentration of DPA concentration released by *B. subtilis*.

**Fig. S26.** Fluorescence emission spectra of L@Mg-Al-Eu-LDHs with different concentrations of DPA in 10% bovine serum, and the plot of fluorescence intensity at  $I_{615}/I_{464}$  against the concentration of DPA.

### **Supplementary Tables:**

**Table S1.** The weight percentage content of elements in L@Mg-Al-Ln-LDHs from ICP-AES and elemental analysis data.

**Table S2.** Fluorescence decay lifetime parameters of L@Mg-Al-Tb-LDHs (545 nm) and L@Mg-Al-Eu-LDHs (615 nm).

**Table S3.** Comparison of some reported probes on DPA detection.

**Table S4.** Results of the analysis of *Bacillus subtilis* spores in real samples using L@Mg-Al-Tb-LDHs and L@Mg-Al-Eu-LDHs.

**Table S5.** RSD datas for the relative intensities of L@Mg-Al-Tb-LDHs ( $I_{545}/I_{464}$ ) and L@Mg-Al-Eu-LDHs ( $I_{615}/I_{464}$ ) in 10% bovine serum.

### **Reference**

## Supplementary Figures

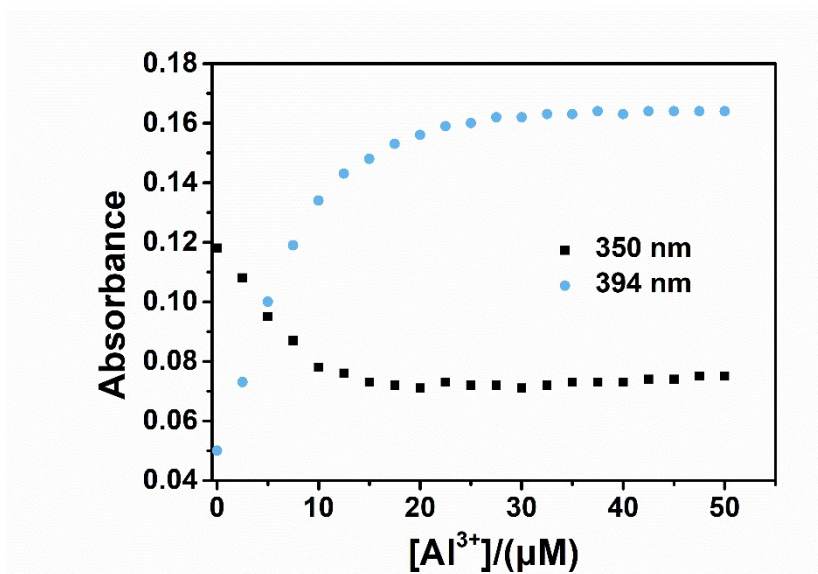

**Fig. S1.** Absorbance at 350 nm and 394 nm of L as a function of  $Al^{3+}$  concentration.

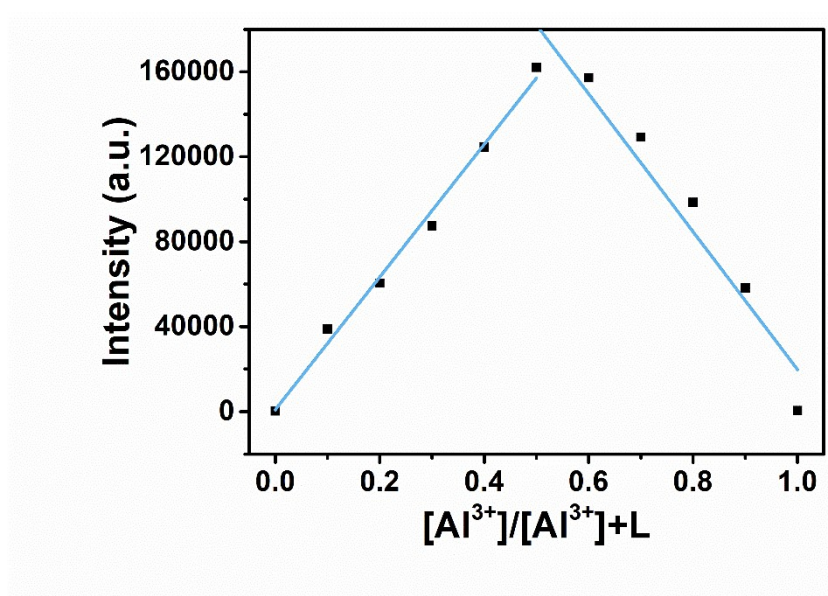

**Fig. S2.** Job's plots according to the method for continuous variations. The total concentration of L and  $Al^{3+}$  is 100  $\mu M$ .

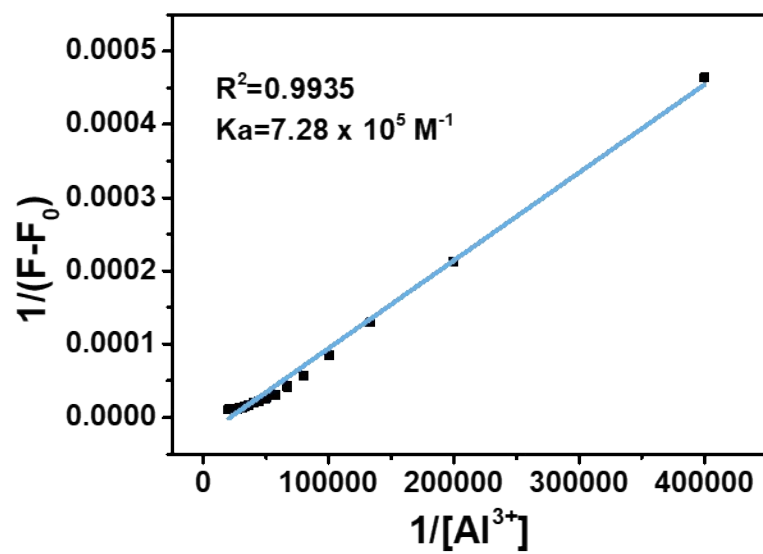

**Fig. S3.** Benesi–Hildebrand plot of L with  $Al^{3+}$  in Tris-HCl buffer solutions (pH=7.5, 10.0 mM).

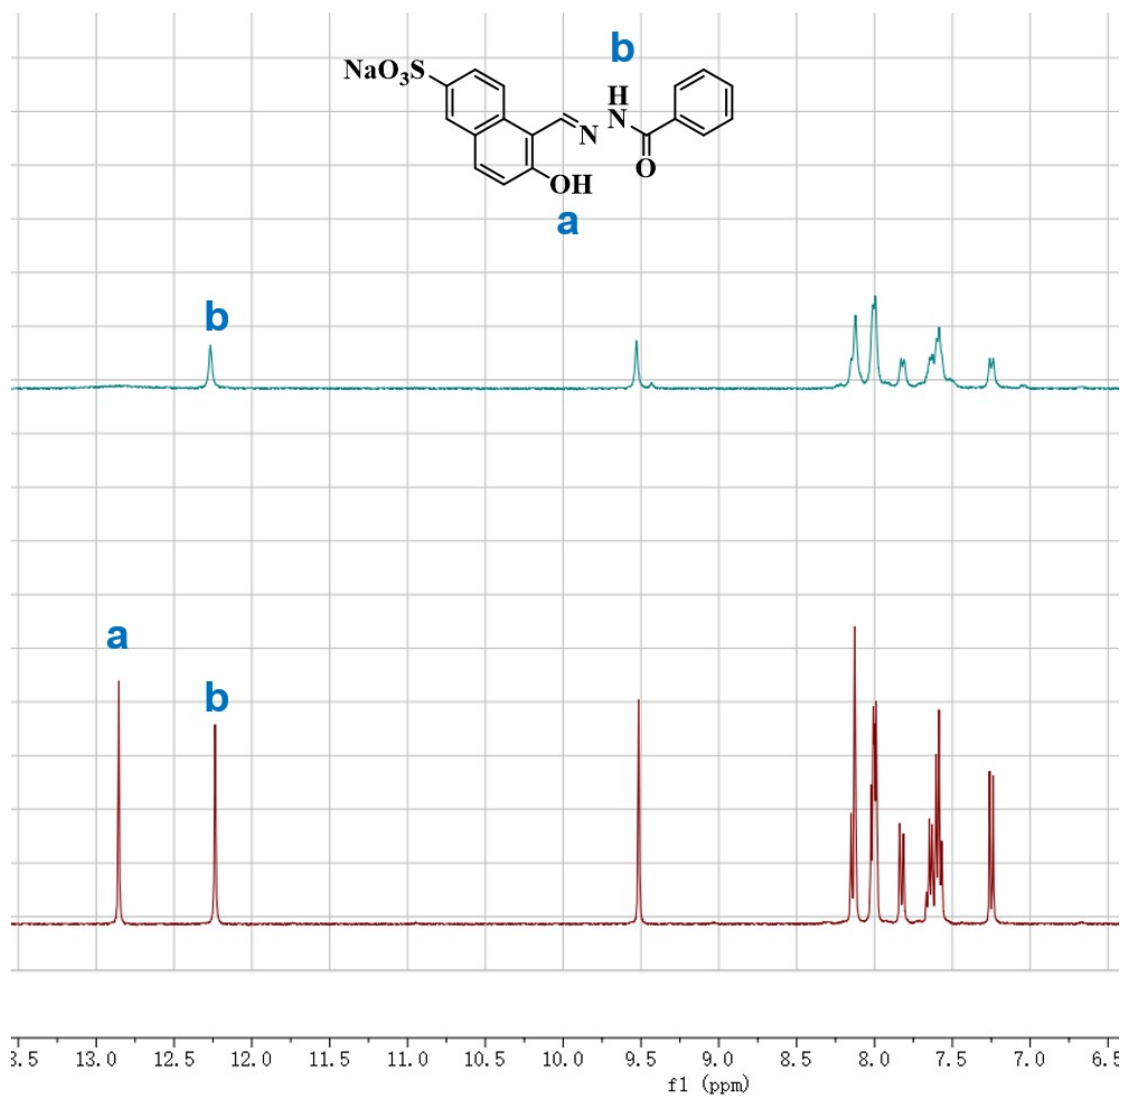

**Fig. S4.**  $^1\text{H}$ NMR titrations of L and L alone with  $\text{Al}^{3+}$  ions in  $\text{DMSO-}d_6$ .

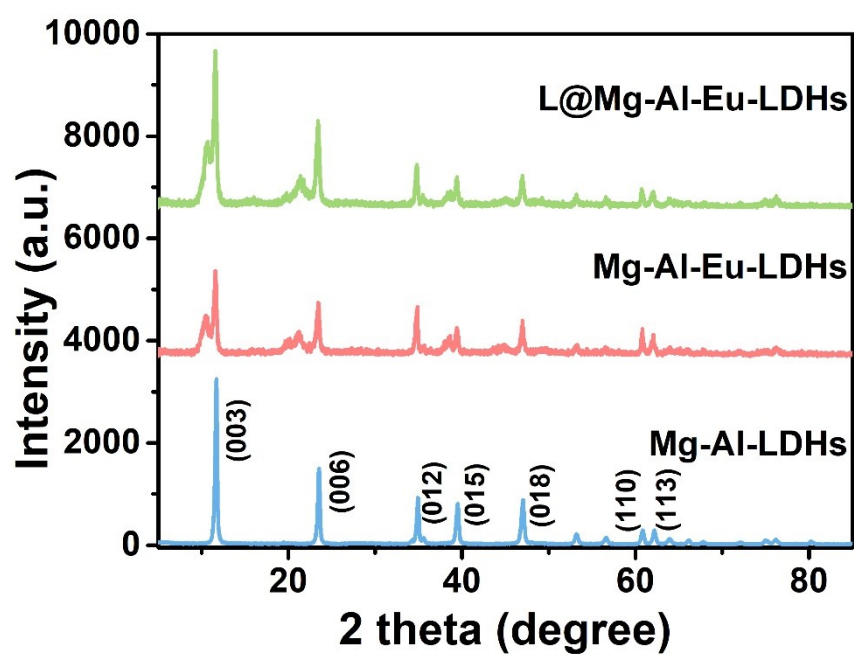

Fig. S5. XRD patterns of Mg-Al-LDHs, Mg-Al-Eu-LDHs and L@Mg-Al-Eu-LDHs.

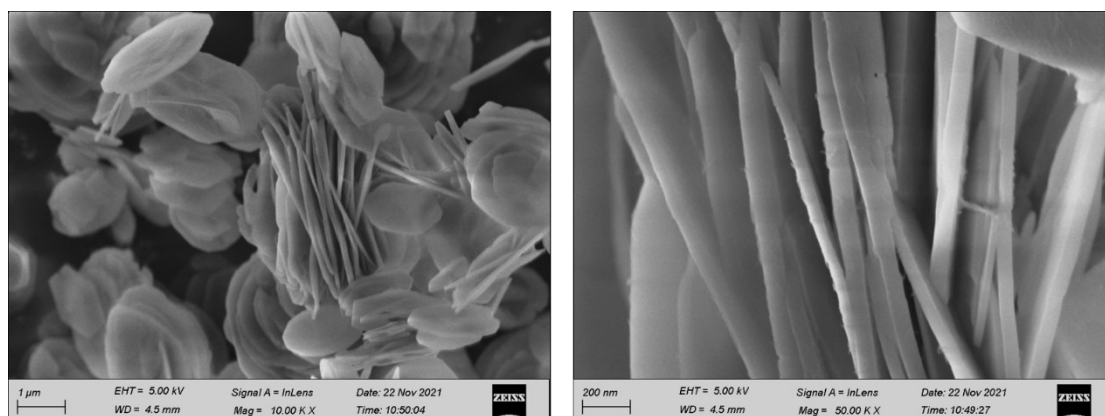

Fig. S6. SEM images of Mg-Al-LDHs.

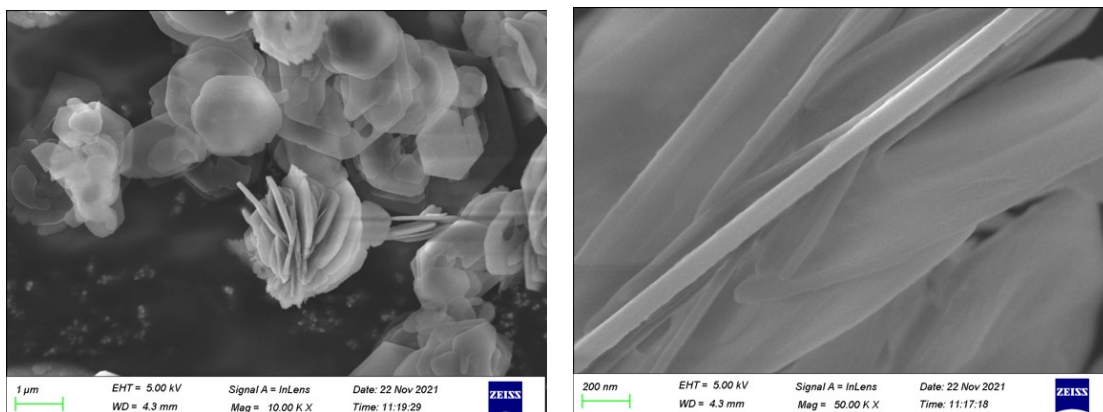

**Fig. S7.** SEM images of Mg-Al-Eu-LDHs.

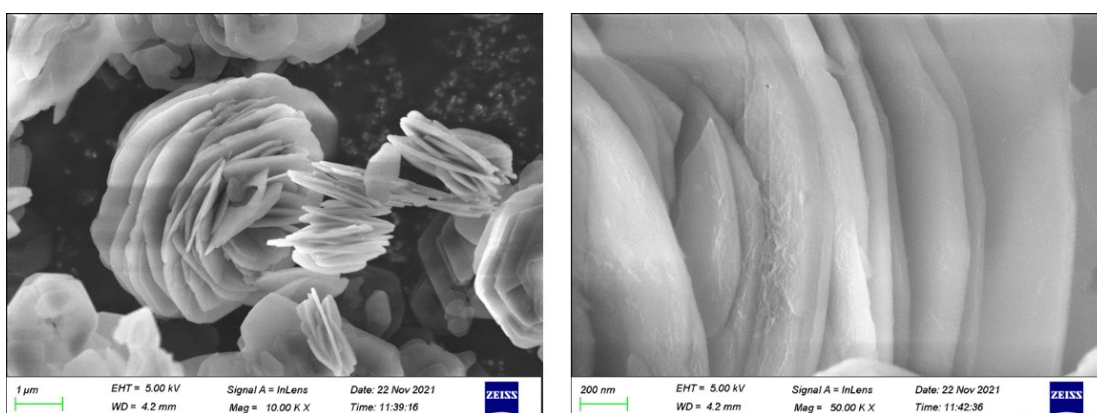

**Fig. S8.** SEM images of L@Mg-Al-Eu-LDHs.

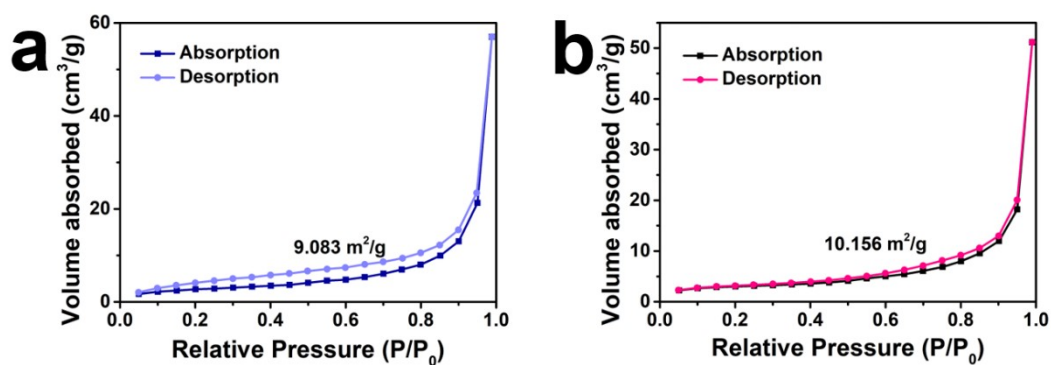

**Fig. S9.** N<sub>2</sub> sorption isotherms and pore-size distribution of (a) L@Mg-Al-Tb-LDHs and (b) L@Mg-Al-Eu-LDHs.

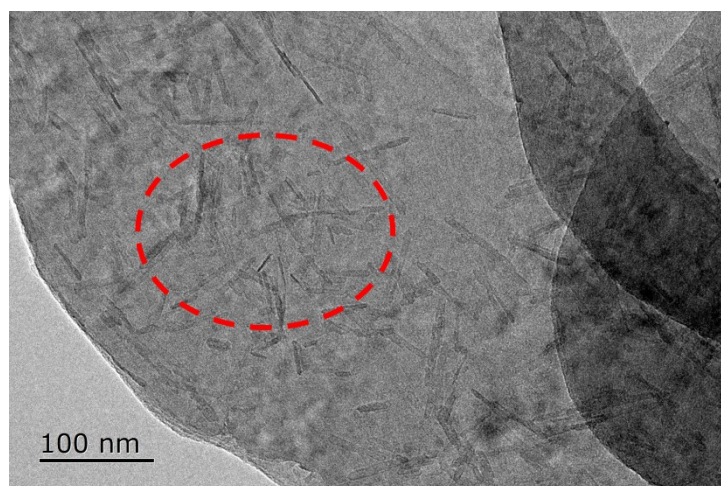

**Fig. S10.** TEM images of L@Mg-Al-Eu-LDHs.

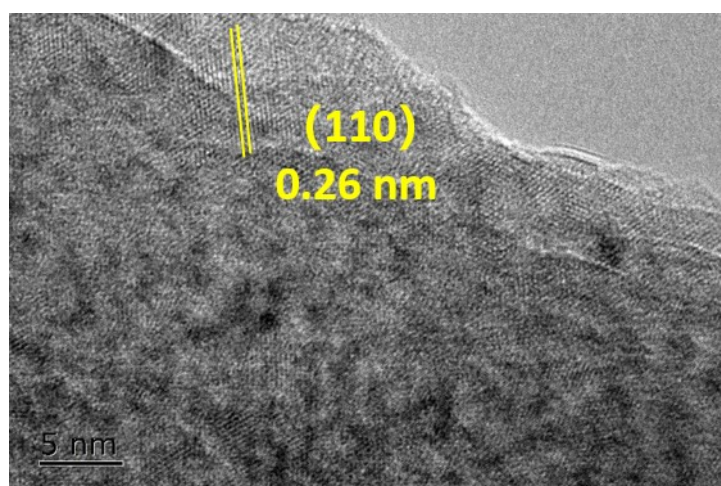

**Fig. S11.** HRTEM images of L@Mg-Al-Eu-LDHs.

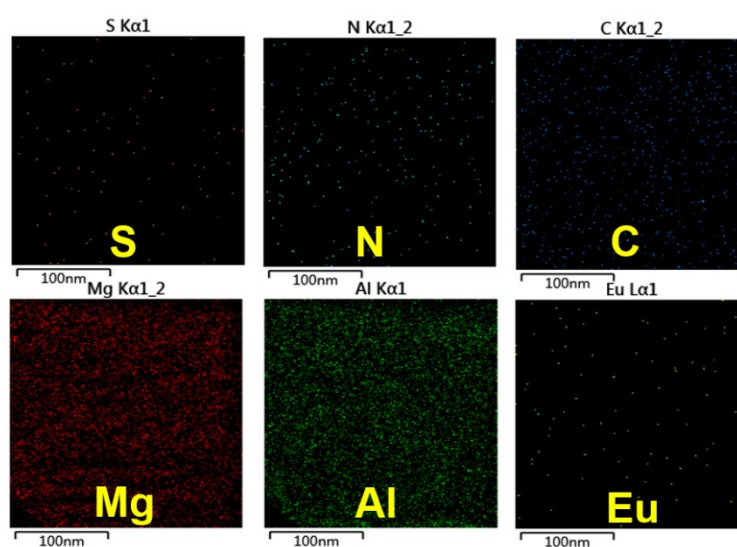

**Fig. S12.** Elemental mapping images of L@Mg-Al-Eu-LDHs.



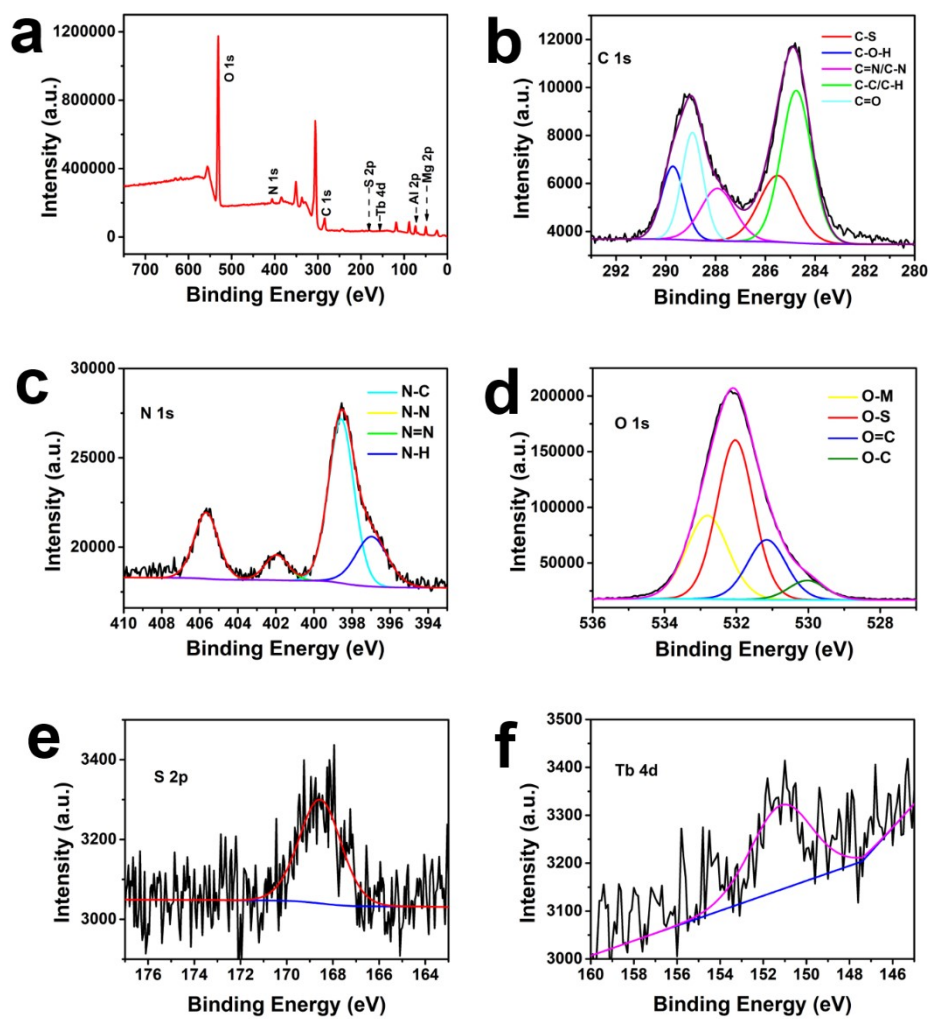

Fig. S13. XPS spectrum of L@Mg-Al-Tb-LDHs.

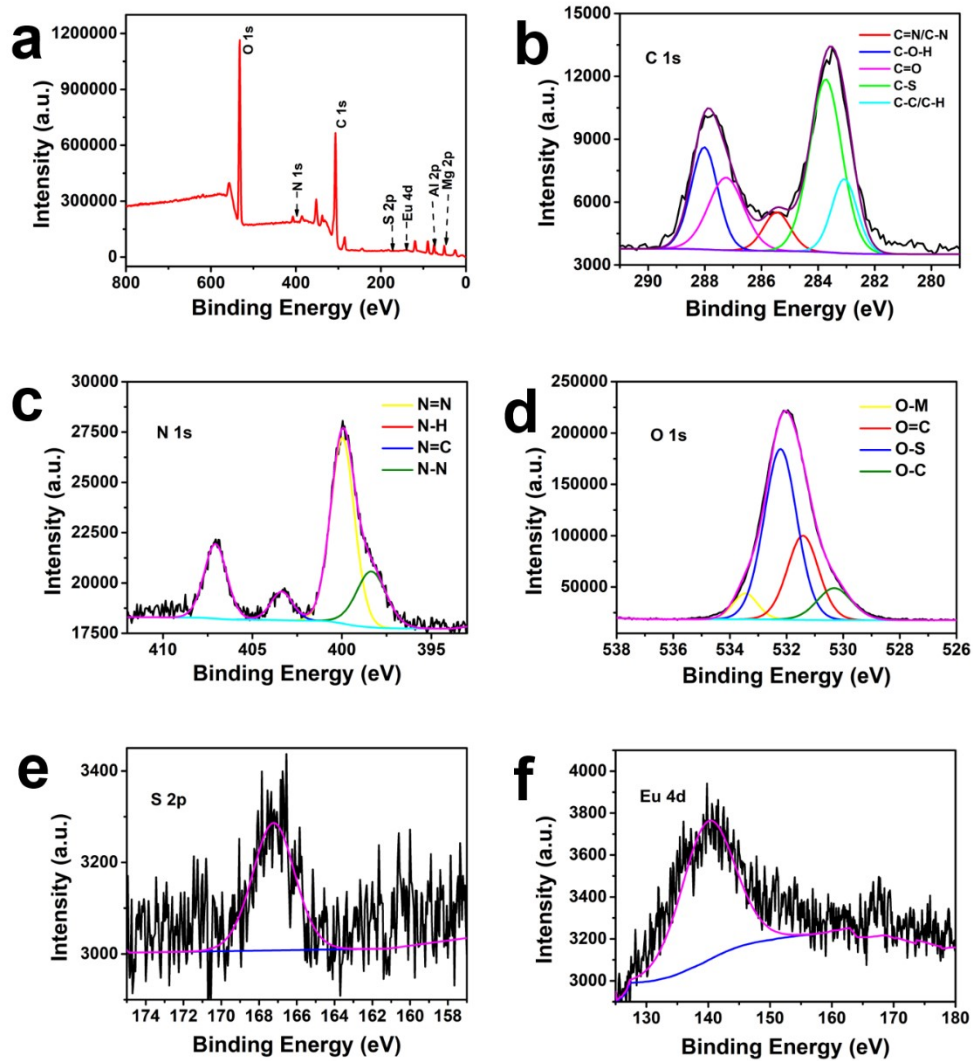

Fig. S14. XPS spectrum of L@Mg-Al-Eu-LDHs.

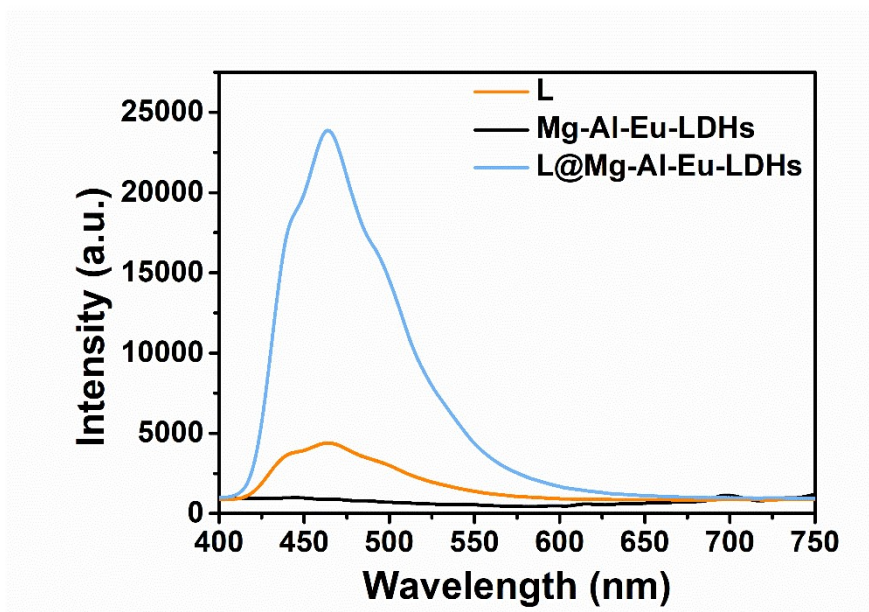

Fig. S15. Fluorescence spectra of L, Mg-Al-Eu-LDHs and L@Mg-Al-Eu-LDHs.

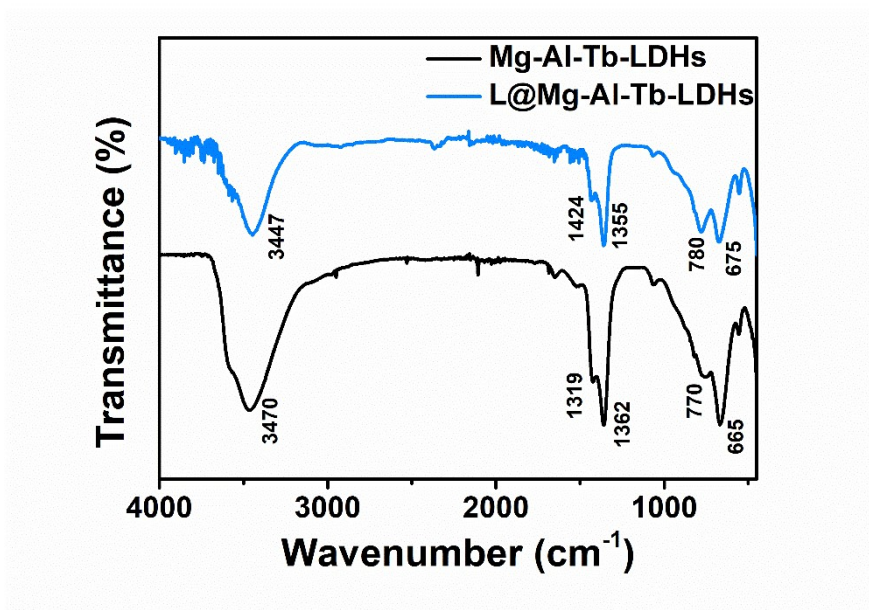

Fig. S16. FTIR spectra of Mg-Al-Tb-LDHs and L@Mg-Al-Tb-LDHs.

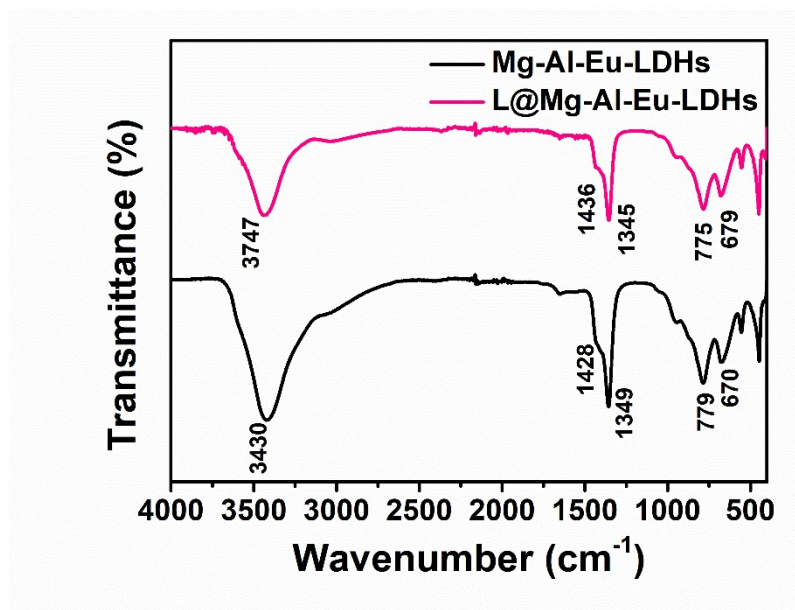

Fig. S17. FTIR spectra of Mg-Al-Eu-LDHs and L@Mg-Al-Eu-LDHs.

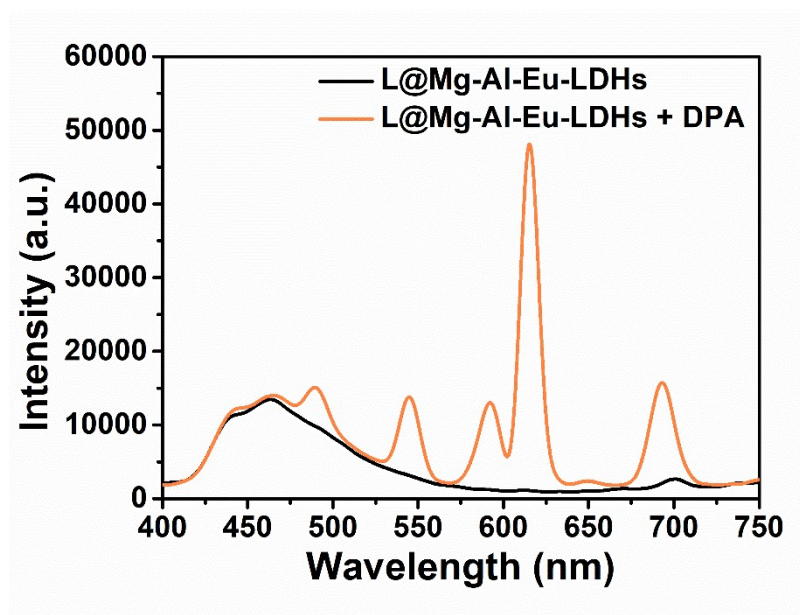

Fig. S18. Fluorescence spectra of L@Mg-Al-Eu-LDHs and L@Mg-Al-Eu-LDHs + DPA.

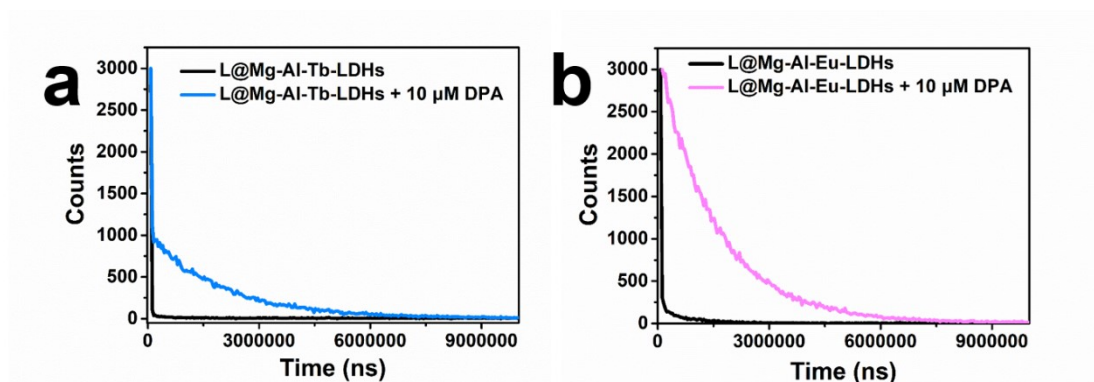

**Fig. S19.** (a) Time-resolved decay curves of L@Mg-Al-Tb-LDHs before and after the addition of DPA,  $\lambda_{\text{ex}}=275$  nm and  $\lambda_{\text{em}}=545$  nm. (b) Time-resolved decay curves of L@Mg-Al-Eu-LDHs before and after the addition of DPA,  $\lambda_{\text{ex}}=275$  nm and  $\lambda_{\text{em}}=615$  nm.

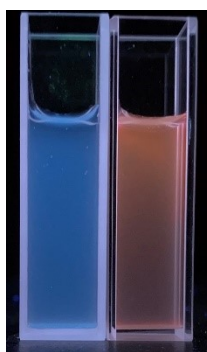

**Fig. S20.** Photographs of L@Mg-Al-Eu-LDHs with and without DPA under 254 nm UV light.

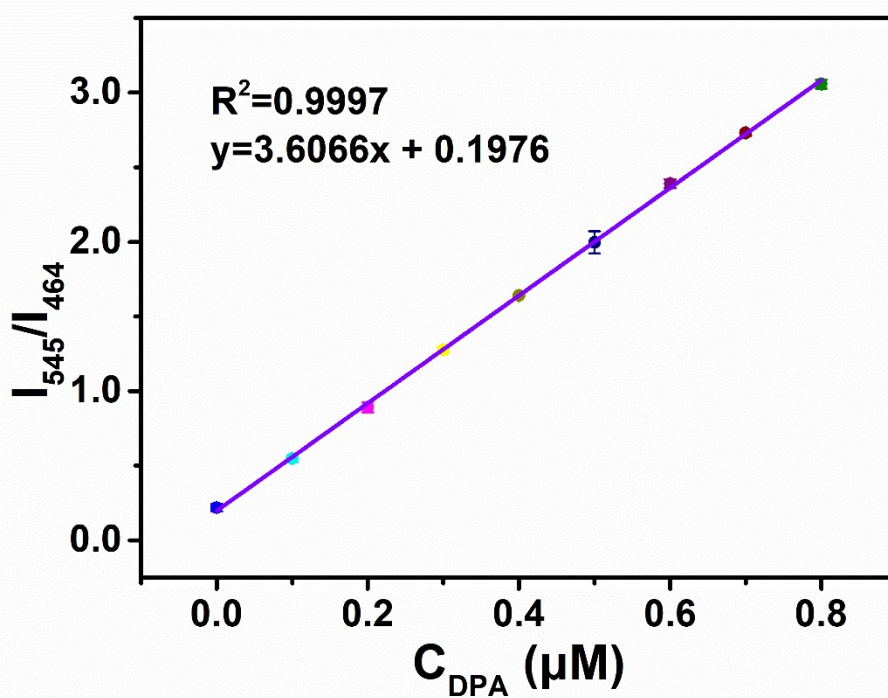

Fig. S21. Plot of fluorescence intensity ratio ( $I_{545}/I_{464}$ ) versus DPA concentration.

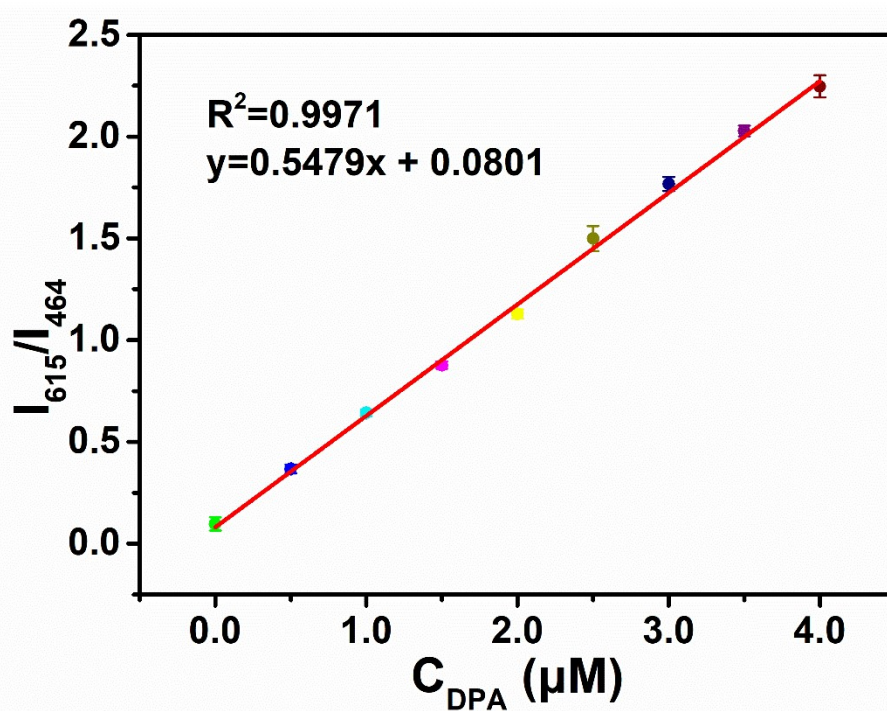

Fig. S22. Plot of fluorescence intensity ratio ( $I_{615}/I_{464}$ ) versus DPA concentration.

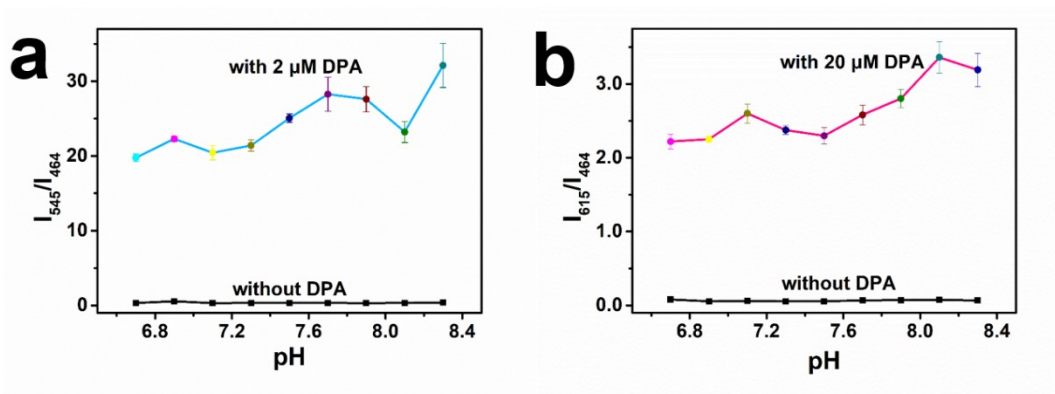

**Fig. S23.** (a) The dependence of  $I_{545}/I_{464}$  ratio of the L@Mg-Al-Tb-LDHs nanoprobe with pH (pH=6.7-8.4). (b) The dependence of  $I_{615}/I_{464}$  ratio of the L@Mg-Al-Eu-LDHs nanoprobe with pH (pH=6.7-8.4).

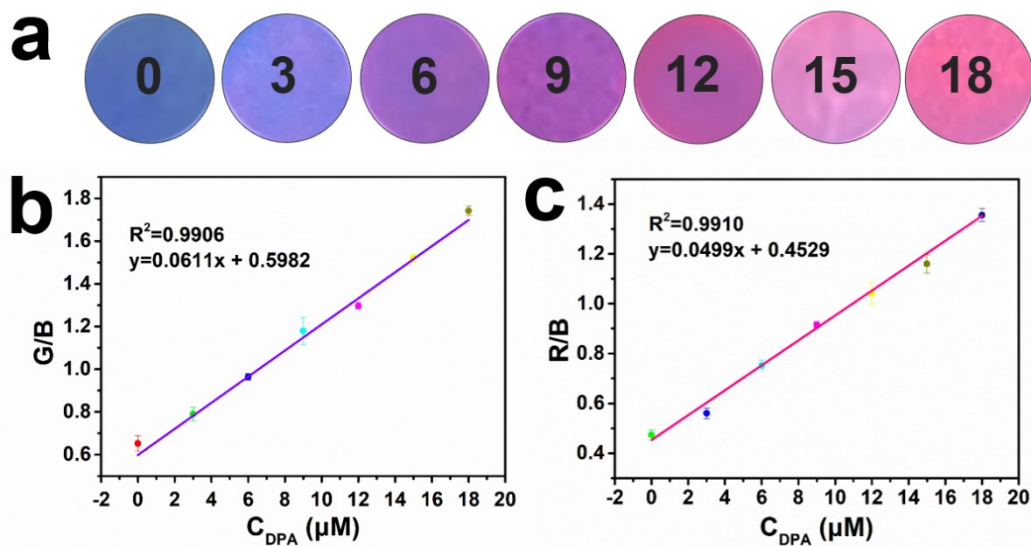

**Fig. S24.** (a) Fluorescence of L@Mg-Al-Eu-LDHs equipped portable test strips for DPA detection (0-18  $\mu$ M). (b) Plot of G/B ratio versus  $C_{DPA}$  ( $\mu$ M). Error bars indicate standard deviations. (c) Plot of R/B ratio versus  $C_{DPA}$  ( $\mu$ M).

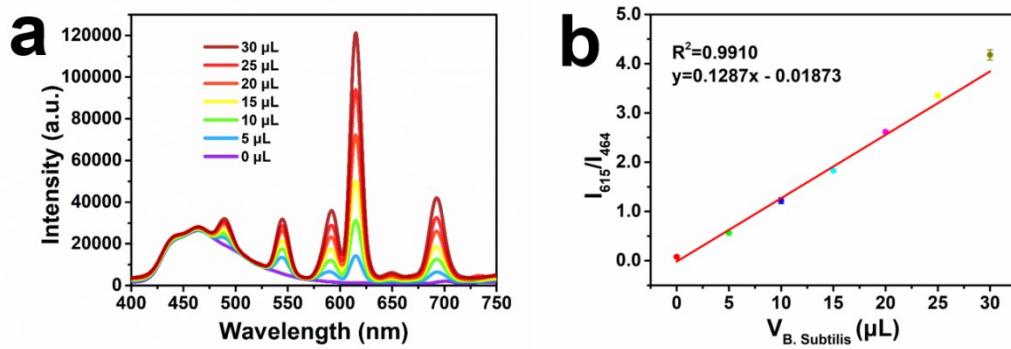

**Fig. S25.** (a) Fluorescence spectra of L@Mg-Al-Eu-LDHs on different volumes of *B. subtilis* spores (0, 5, 10, 15, 20, 25, 30  $\mu\text{L}$ ). (b) The plot of fluorescence intensity at  $I_{615}/I_{464}$  against the concentration of DPA concentration released by *B. subtilis*.

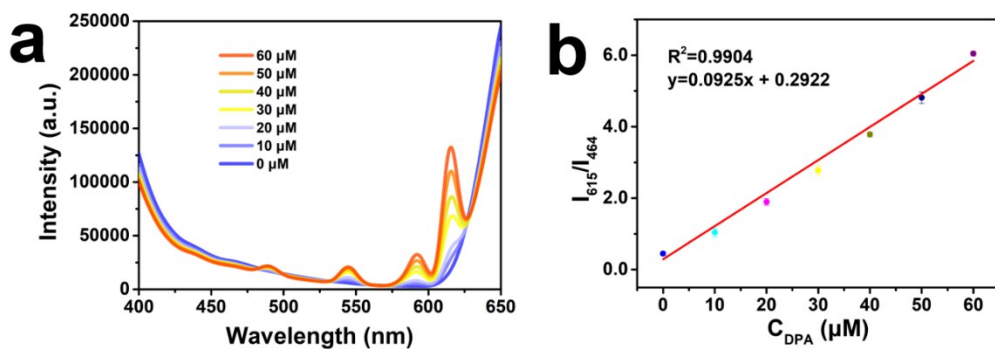

**Fig. S26.** (a) Fluorescence emission spectra of L@Mg-Al-Eu-LDHs with different concentrations of DPA in 10% bovine serum. (b) The plot of fluorescence intensity at  $I_{615}/I_{464}$  against the concentration of DPA from 0 to 60  $\mu\text{M}$  (0, 10, 20, 30, 40, 50, 60  $\mu\text{M}$ ).



## Supplementary Tables

**Table S1.** The weight percentage content of elements in L@Mg-Al-Ln-LDHs from ICP-AES and elemental analysis data.

| Element         | Mg (wt%) | Al (wt%) | Tb (wt%) | Eu (wt%) |
|-----------------|----------|----------|----------|----------|
| L@Mg-Al-Tb-LDHs | 16.74    | 9.87     | 0.65     |          |
| L@Mg-Al-Eu-LDHs | 16.12    | 10.119   |          | 0.43     |

**Table S2.** Fluorescence decay lifetime parameters of L@Mg-Al-Tb-LDHs (545 nm) and L@Mg-Al-Eu-LDHs (615 nm).

| Sensors         | DPA<br>Concentration<br>( $\mu\text{M}$ ) | $\tau_1$<br>( $\mu\text{s}$ ) | $\tau_2$<br>( $\mu\text{s}$ ) | $\tau_{\text{ave}}$<br>( $\mu\text{s}$ ) |
|-----------------|-------------------------------------------|-------------------------------|-------------------------------|------------------------------------------|
| L@Mg-Al-Tb-LDHs | 0                                         | 11.76                         | 11.76                         | 2.35                                     |
|                 | 10                                        | 14.61                         | 1953.63                       | 432.82                                   |
| L@Mg-Al-Eu-LDHs | 0                                         | 618.30                        | 12.75                         | 17.18                                    |
|                 | 10                                        | 1534.01                       | 1534.00                       | 1530.68                                  |

**Table S3.** Comparison of some reported probes on DPA detection.

| <b>Sensing material</b>                          | <b>Linear range</b>                        | <b>LOD</b>           | <b>Ref.</b> |
|--------------------------------------------------|--------------------------------------------|----------------------|-------------|
| <b>Eu/Tb SAH</b>                                 | 0-3.0 $\mu\text{M}$<br>0-2.4 $\mu\text{M}$ | 27.3 nM<br>1.06 nM   | [1]         |
| <b>CDs-Tb</b>                                    | 0-6 $\mu\text{M}$                          | 35.9 nM              | [2]         |
| <b>TPE-Tbs</b>                                   | 0-18 nM                                    | 0.187 nM             | [3]         |
| <b>TbP-CPs</b>                                   | 0-8 $\mu\text{M}$                          | 5.0 nM               | [4]         |
| <b>Tb-g-C<sub>3</sub>N<sub>4</sub>NS</b>         | 0-15 $\mu\text{M}$                         | 9.9 nM               | [5]         |
| <b>hPEI-CD-EDTA-Eu<sup>3+</sup></b>              | 1.0-100 nM                                 | 0.19 nM              | [6]         |
| <b>EBT-CDs@Eu</b>                                | 0.1-12 $\mu\text{M}$                       | 10.6 nM              | [7]         |
| <b>Eu@SiNPs</b>                                  | 0-20 $\mu\text{M}$                         | 0.15 $\mu\text{M}$   | [8]         |
| <b>GSH-Cu NCs/Eu<sup>3+</sup></b>                | 0-20 $\mu\text{M}$                         | 8 nM                 | [9]         |
| <b>Tb<sub>0.875</sub>Eu<sub>0.125</sub>-Hddb</b> | 0-100 $\mu\text{M}$                        | 0.8494 $\mu\text{M}$ | [10]        |
| <b>L@Mg-Al-Tb-LDHs</b>                           | 0-0.8 $\mu\text{M}$                        | 11.6 nM              | This work   |
| <b>L@Mg-Al-Eu-LDHs</b>                           | 0-4.0 $\mu\text{M}$                        | 27.3 nM              |             |

**Table S4.** Results of the analysis of *Bacillus subtilis* spores in real samples using L@Mg-Al-Tb-LDHs and L@Mg-Al-Eu-LDHs (n=3).

| <b>Sensors</b>         | <b>Spores added</b>         | <b>Detected</b>             | <b>Recovery<br/>(%, n=3)</b> | <b>RSD<br/>(%, n=3)</b> |
|------------------------|-----------------------------|-----------------------------|------------------------------|-------------------------|
| <b>L@Mg-Al-Tb-LDHs</b> | <b>0</b>                    | <b>Not detected</b>         |                              |                         |
|                        | <b>1.000×10<sup>6</sup></b> | <b>1.026×10<sup>6</sup></b> | <b>102.59</b>                | <b>0.74</b>             |
|                        | <b>2.000×10<sup>6</sup></b> | <b>1.959×10<sup>6</sup></b> | <b>97.95</b>                 | <b>0.71</b>             |
|                        | <b>3.000×10<sup>6</sup></b> | <b>2.872×10<sup>6</sup></b> | <b>95.74</b>                 | <b>0.17</b>             |
|                        | <b>4.000×10<sup>6</sup></b> | <b>3.740×10<sup>6</sup></b> | <b>93.49</b>                 | <b>1.23</b>             |
|                        | <b>5.000×10<sup>6</sup></b> | <b>4.731×10<sup>6</sup></b> | <b>94.61</b>                 | <b>2.55</b>             |
|                        | <b>6.000×10<sup>6</sup></b> | <b>5.686×10<sup>6</sup></b> | <b>94.76</b>                 | <b>2.09</b>             |
| <b>L@Mg-Al-Eu-LDHs</b> | <b>0</b>                    | <b>Not detected</b>         |                              |                         |
|                        | <b>1.000×10<sup>6</sup></b> | <b>1.081×10<sup>6</sup></b> | <b>108.13</b>                | <b>0.37</b>             |
|                        | <b>2.000×10<sup>6</sup></b> | <b>2.002×10<sup>6</sup></b> | <b>100.11</b>                | <b>0.99</b>             |
|                        | <b>3.000×10<sup>6</sup></b> | <b>2.904×10<sup>6</sup></b> | <b>96.79</b>                 | <b>1.28</b>             |
|                        | <b>4.000×10<sup>6</sup></b> | <b>3.883×10<sup>6</sup></b> | <b>97.08</b>                 | <b>1.27</b>             |
|                        | <b>5.000×10<sup>6</sup></b> | <b>4.751×10<sup>6</sup></b> | <b>95.02</b>                 | <b>3.34</b>             |
|                        | <b>6.000×10<sup>6</sup></b> | <b>5.587×10<sup>6</sup></b> | <b>93.11</b>                 | <b>1.51</b>             |

**Table S5.** RSD datas (n=3) for the relative intensities of L@Mg-Al-Tb-LDHs ( $I_{545}/I_{464}$ ) and L@Mg-Al-Eu-LDHs ( $I_{615}/I_{464}$ ) in 10% bovine serum.

| <b>Sample</b>          | <b>DPA added<br/>(<math>\mu\text{M}</math>)</b> | <b>Detected<br/>(<math>\mu\text{M}</math>)</b> | <b>Recovery<br/>(%, n=3)</b> | <b>RSD<br/>(%, n=3)</b> |
|------------------------|-------------------------------------------------|------------------------------------------------|------------------------------|-------------------------|
| <b>L@Mg-Al-Tb-LDHs</b> | <b>0</b>                                        | <b>Not detected</b>                            |                              |                         |
|                        | <b>1.00</b>                                     | <b>1.0210</b>                                  | <b>99.88</b>                 | <b>0.74</b>             |
|                        | <b>2.00</b>                                     | <b>1.9820</b>                                  | <b>95.27</b>                 | <b>0.71</b>             |
|                        | <b>3.00</b>                                     | <b>2.9129</b>                                  | <b>103.99</b>                | <b>0.17</b>             |
|                        | <b>4.00</b>                                     | <b>3.8859</b>                                  | <b>105.76</b>                | <b>1.22</b>             |
|                        | <b>5.00</b>                                     | <b>4.8108</b>                                  | <b>104.50</b>                | <b>2.54</b>             |
|                        | <b>6.00</b>                                     | <b>5.8378</b>                                  | <b>109.72</b>                | <b>2.09</b>             |
| <b>L@Mg-Al-Eu-LDHs</b> | <b>0</b>                                        | <b>Not detected</b>                            |                              |                         |
|                        | <b>10.00</b>                                    | <b>10.345</b>                                  | <b>103.45</b>                | <b>0.37</b>             |
|                        | <b>20.00</b>                                    | <b>19.466</b>                                  | <b>97.33</b>                 | <b>0.99</b>             |
|                        | <b>30.00</b>                                    | <b>28.272</b>                                  | <b>94.24</b>                 | <b>1.28</b>             |
|                        | <b>40.00</b>                                    | <b>38.864</b>                                  | <b>97.16</b>                 | <b>1.27</b>             |
|                        | <b>50.00</b>                                    | <b>47.465</b>                                  | <b>94.93</b>                 | <b>3.34</b>             |
|                        | <b>60.00</b>                                    | <b>62.634</b>                                  | <b>104.39</b>                | <b>1.51</b>             |

## Reference

1. P. Su, X. Wang, T. Wang, X. Feng, M. Zhang, L. Liang, J. Cao, W. Liu and Y. Tang, Eu(3+)/Tb(3+) supramolecular assembly hybrids for ultrasensitive and ratiometric detection of anthrax spore biomarker in water solution and actual spore samples, *Talanta*, 2021, **225**, 122063.
2. L. Zhang, Z. Wang, J. Zhang, C. Shi, X. Sun, D. Zhao and B. Liu, Terbium Functionalized Schizochytrium-Derived Carbon Dots for Ratiometric Fluorescence Determination of the Anthrax Biomarker, *Nanomaterials (Basel)*, 2019, **9**, 1234.
3. P. Su, L. Liang, T. Wang, P. Zhou, J. Cao, W.-S. Liu and Y. Tang, AIE-based Tb<sup>3+</sup> complex self-assembled nanoprobe for ratiometric fluorescence detection of anthrax spore biomarker in water solution and actual spore samples, *Chemical Engineering Journal*, 2021, **413**, 127408.
4. Y. Luo, L. Zhang, L. Zhang, B. Yu, Y. Wang and W. Zhang, Multiporous Terbium Phosphonate Coordination Polymer Microspheres as Fluorescent Probes for Trace Anthrax Biomarker Detection, *ACS Appl Mater Interfaces*, 2019, **11**, 15998-16005.
5. Y. Y. Ma, Z. J. Wang and D. J. Qian, Ratiometric fluorescence detection of anthrax biomarker based on terbium (III) functionalized graphitic carbon nitride nanosheets, *Talanta*, 2021, **230**, 122311.
6. H. Yang, F. Lu, X. Zhan, M. Tian, Z. Yuan and C. Lu, A Eu(3+)-inspired fluorescent carbon nanodot probe for the sensitive visualization of anthrax biomarker by integrating EDTA chelation, *Talanta*, 2020, **208**, 120368.
7. Q. Zhou, Y. Fang, J. Li, D. Hong, P. Zhu, S. Chen and K. Tan, A design strategy of dual-ratiometric optical probe based on europium-doped carbon dots for colorimetric and fluorescent visual detection of anthrax biomarker, *Talanta*, 2021, **222**, 121548.
8. M. Na, S. Zhang, J. Liu, S. Ma, Y. Han, Y. Wang, Y. He, H. Chen and X. Chen, Determination of pathogenic bacteria-Bacillus anthrax spores in environmental samples by ratiometric fluorescence and test paper based on dual-emission fluorescent silicon nanoparticles, *J Hazard Mater*, 2020, **386**, 121956.
9. J. Zhao, Y. Chen, P. Du, J. Li, Z. Zhang and X. Lu, Portable smartphone platform integrated with fluorescent test strip based on Eu<sup>3+</sup>-functionalized copper nanoclusters for on-site visual recognition of a pathogenic biomarker, *Sensors and Actuators B: Chemical*, 2021, **332**, 127918.
10. X.-B. Chen, C.-X. Qi, Y.-B. Xu, H. Li, L. Xu and B. Liu, A quantitative ratiometric fluorescent Hddb-based MOF sensor and its on-site detection of the anthrax biomarker 2,6-dipicolinic acid, *Journal of Materials Chemistry C*, 2020, **8**, 17325-17335.
